1 **The Fatty Acid Methyl Ester (FAME) profile of *Phytophthora agathidicida* and its**  
2 **potential use as diagnostic tool.**

3

4 Randy F. Lacey<sup>1,2\*</sup>, Blake A. Sullivan-Hill<sup>1</sup>, Julie R. Deslippe<sup>1,4</sup>, Robert A. Keyzers<sup>2,3,4</sup>, and  
5 Monica L. Gerth<sup>1,2</sup>

6

7 **Affiliations:**

8 <sup>1</sup>School of Biological Sciences, Victoria University of Wellington, New Zealand

9 <sup>2</sup>Centre for Biodiscovery, Victoria University of Wellington, New Zealand

10 <sup>3</sup>School of Chemical and Physical Sciences, Victoria University of Wellington, New Zealand

11 <sup>4</sup>Centre for Biodiversity and Restoration Ecology, Victoria University of Wellington, New  
12 Zealand

13

14 **\*Corresponding author:** Address: School of Biological Sciences, Level 2, Te Toki a Rata  
15 Building, Victoria University of Wellington, Wellington, 6012; Tel: +64 2102468945;  
16 E-mail: [randy.lacey@vuw.ac.nz](mailto:randy.lacey@vuw.ac.nz)

17

18

19

20

21

22

23

24

25

26

27

28

29

30

31

32

33

34

35 **Abstract:**

36 *Phytophthora* diseases cause devastation to crops and native ecosystems worldwide.  
37 In New Zealand, *Phytophthora agathidicida* is threatening the survival of kauri, an endemic,  
38 culturally and ecologically important tree species. The current method for detecting *P.*  
39 *agathidicida* is a soil bating assay that is time-consuming and requires high levels of  
40 expertise to assess, thus limiting the analytical sample throughput. Here, we characterized the  
41 fatty acid methyl ester (FAME) profile of *P. agathidicida*. We also compared it with the  
42 FAME profile of *P. cinnamomi* and assessed the efficacy of FAME analysis as a diagnostic  
43 tool for detecting the pathogen in soil samples. In FAME analysis, the total fatty acid content  
44 is isolated from a sample and converted to FAMEs for analysis, a process that takes less than  
45 a day. Unique fatty acid acyl chains can serve as biomarkers for specific organisms. We  
46 detected 12 fatty acids in *P. agathidicida*, two of which (20:4 $\omega$ 6 and 20:5 $\omega$ 3) show promise  
47 as potential *Phytophthora* specific biomarkers. Collectively, these findings advance our  
48 fundamental understanding of *P. agathidicida* biology and provide a promising technique to  
49 increase the rate of sample processing and the speed of pathogen detection for  
50 *P. agathidicida* in soil.

51  
52  
53  
54  
55  
56  
57  
58  
59  
60  
61  
62  
63  
64  
65  
66  
67

## 68 **Introduction:**

69 *Phytophthora agathidicida* is a recently identified plant pathogen that is threatening  
70 New Zealand's native kauri trees (*Agathis australis*) (Weir *et al.*, 2015, Bellgard *et al.*, 2016).  
71 It is the causative agent of kauri dieback disease, which has spread throughout most regions  
72 within the natural range of kauri (Bradshaw *et al.*, 2020). Kauri trees are massive and can live  
73 for thousands of years. Because of this, there can be a latency period from infection to the  
74 expression of symptoms (Bradshaw *et al.*, 2020). Thus, detection of *P. agathidicida* in soil,  
75 before the onset of disease symptoms, is critical for managing the spread of kauri dieback.  
76 Currently, there are limited tools available to control the spread of disease, and improved  
77 surveillance and diagnostics is an urgent priority for research (Bradshaw *et al.*, 2020).

78 *Phytophthora* can spread in a variety of ways, including by water, root to root contact,  
79 and movement of contaminated plant tissue or soil (Erwin & Ribeiro, 1996). The lifecycle of  
80 *Phytophthora* species is commonly characterized by the production of vegetative mycelial  
81 growth and various spore types (Erwin & Ribeiro, 1996). Zoospores are short-lived, motile  
82 spores that initiate infection in roots (Bradshaw *et al.*, 2020). Oospores are thick-walled,  
83 dormant spores that can survive in soil for years (Bradshaw *et al.*, 2020). Each lifecycle stage  
84 plays a critical role in disease spread. In New Zealand there are at least 30 known species of  
85 *Phytophthora* that cause disease in agricultural, horticultural, and indigenous forest settings  
86 (Scott & Williams, 2014). For example, *P. cinnamomi* often co-occurs with *P. agathidicida*  
87 at sites of infected kauri (Waipara *et al.*, 2013).

88 Currently the primary method used to detect *P. agathidicida* in soil is a baiting assay  
89 (Beever *et al.*, 2010). Soil-baiting is a method that is used for detection and isolation of many  
90 different *Phytophthora* species (Erwin & Ribeiro, 1996, O'Brien *et al.*, 2009). This method is  
91 effective but has limitations; it is slow (2-3 weeks) and requires a high level of expertise to  
92 correctly identify the colony and spore morphology that distinguishes *P. agathidicida* from  
93 other *Phytophthora* species (Beever *et al.*, 2010, Bradshaw *et al.*, 2020). These limitations  
94 reduce sample throughput, which limits the capacity to monitor the geographic spread of  
95 *P. agathidicida* in a timely manner. More rapid DNA-based molecular diagnostic tools are in  
96 development, but so far have limited effectiveness for detecting *P. agathidicida* in soil  
97 samples (Than *et al.*, 2013, McDougal *et al.*, 2014, Winkworth *et al.*, 2020).

98 Fatty acid methyl ester (FAME) analysis is potentially an alternative or  
99 complementary tool for the detection of organisms in soil. FAME analysis has been used  
100 extensively to characterize microbial community structure in soils and has also been applied  
101 as a diagnostic tool for the detection of specific organisms in environmental samples

102 (Cavigelli *et al.*, 1995, Drenovsky *et al.*, 2004, Rastogi & Rajesh, 2011, Yousef *et al.*, 2012).  
103 In FAME analysis, total lipids are extracted from an organism or environmental sample, acyl  
104 chains are released as fatty acids and converted to their corresponding methyl esters with  
105 subsequent gas chromatography-mass spectrometry (GC-MS) analysis (Welch, 1991,  
106 Drenovsky *et al.*, 2004). Organisms differ in the types and quantities of acyl chains that are  
107 components of their lipids (White *et al.*, 2002, Ehrhardt *et al.*, 2010). Consequently, the  
108 presence of or varying ratios of specific FAMES can indicate the presence and quantitative  
109 abundance of particular taxa in a sample, in which case the FAME or ratio of FAMES may be  
110 considered a biomarker. For example, the neutral lipid 16:1 $\omega$ 5 is widely used as an indicator  
111 of arbuscular mycorrhizal fungi in soils (Olsson, 1999). Specific to *Phytophthora*, it was  
112 shown that soils with *P. sojae* zoospores added showed increased levels of 18:2 $\omega$ 6, 20:4 $\omega$ 6,  
113 and 22:1 $\omega$ 6, indicating that increased ratios of these fatty acids to background fatty acids may  
114 potentially serve as a biomarker for the presence of *P. sojae* in soil (Yousef *et al.*, 2012).  
115 Additionally, A significant advantage of a FAME approach, relative to soil baiting and PCR-  
116 based methods, is the potential to quantify the biomass of the pathogen in the sample. Finally,  
117 the characterisation of FAMES is relatively rapid; the process from a sample to quantitative  
118 detection of a biomarker can take less than a day.

119 Here, we present the results of FAME analysis of *P. agathidicida* across several key  
120 lifecycle stages, including mycelia, oospores, and zoospores. Additionally, a comparison of  
121 FAME profiles of *P. agathidicida* and *P. cinnamomi* reveals that many fatty acids are  
122 conserved between the two species; no fatty acids unique to *P. agathidicida* were identified.  
123 However, elevated ratios of the long-chain polyunsaturated fatty acids 20:5 $\omega$ 3 and 20:4 $\omega$ 6  
124 were observed in soil samples with *P. agathidicida* oospores added. This suggests that FAME  
125 analysis may be a useful diagnostic tool for the detection of *Phytophthora* species in soil.

126

## 127 **Materials and Methods:**

### 128 *Culture conditions and mycelia production*

129 *P. agathidicida* NZFS 3770 and *P. cinnamomi* NZFS 3910 (obtained from Scion,  
130 Rotorua, NZ) were maintained regularly on 10% clarified V8 (cV8) agar plates in the dark at  
131 22 °C. Mycelia is a common tissue source of lipids for FAME profiling of *Phytophthora*  
132 species (Larkin & Groves, 2003, Duan *et al.*, 2013). Soil microbes may adjust the relative  
133 concentrations of membrane lipids to acclimate to different growth temperature (Griffiths *et*  
134 *al.*, 2003, Yousef *et al.*, 2012). Therefore, we initially characterized the basic fatty acid

135 profile of *P. agathidicida* mycelia at two different temperatures. We selected 16 °C as a value  
136 similar to mean annual temperature in the host's range and 22 °C as *P. agathidicida* shows  
137 optimal growth *in vitro* culture at this value. Mycelial mats for lipid extraction were grown in  
138 liquid 10% cV8 broth for 48 h at 16 °C and 22 °C in the dark. Mycelia were separated from  
139 the agar plug from which growth was initiated and washed in deionized water to remove  
140 residual cV8 broth.

141

#### 142 *Oospore production*

143 *P. agathidicida* oospores were produced as described in Fairhurst et al. (Fairhurst *et*  
144 *al.*, 2021). Briefly, three 3 mm agar plugs were taken from the leading edge of mycelial  
145 growth on agar plates and inoculated in 15 mL of 4% w/v carrot broth containing 12 µg/mL  
146 β-sitosterol and grown in the dark at 22 °C for two weeks. The resulting mycelial mats were  
147 harvested and oospores were isolated by homogenization using a tissue homogenizer for 2  
148 min followed by sonication for 1 min on ice. The homogenized mixture was sequentially  
149 filtered through 100 µm and 40 µm filters to separate the oospores from mycelial fragments.  
150 The concentration of the filtered oospore suspension (oospores/mL) was estimated using a  
151 disposable hemocytometer by averaging three separate counts.

152

#### 153 *Zoospore production*

154 *P. agathidicida* zoospores were produced as described in Lacey et al. (Lacey *et al.*,  
155 2021). Briefly, mycelial mats were initially grown in 2% w/v carrot broth supplemented with  
156 15 µg/mL β-sitosterol for 30 h. The mycelial mats were then washed with 2% w/v soil  
157 solution and incubated under light for 14 h. The soil solution was removed and the mycelial  
158 mats were washed with water. Zoospore release was induced by adding ice-cold water and  
159 incubating the mycelial mats at 4 °C for 20 min. After sufficient zoospore release, the  
160 concentration of spores was estimated using disposable hemocytometers by averaging three  
161 separate spore counts.

162

#### 163 *Fatty acid extraction, conversion to FAMES, and GC-MS analysis*

164 For FAME analyses, mycelia (~200 mg) from *P. agathidicida* and *P. cinnamomi* were  
165 grown and prepared as described above in biological triplicate. For *P. agathidicida* oospore  
166 and zoospore analyses, each spore type was produced as described above. A total of 250,000  
167 zoospores or 100,000 oospores in 250 µL was used for lipid extraction. For the detection of

168 oospores in soil, we collected five soil samples from forest and garden locations in  
169 Wellington, NZ, a region outside the native range of kauri and presumably free of  
170 *P. agathidicida*. Soil samples were collected with a trowel, which was sterilized with 70%  
171 ethanol between samples. Soil samples were sealed in plastic bags and placed on ice for  
172 transport to the laboratory. Samples were then freeze-dried and stored at -20 °C. Laboratory  
173 grown oospores were added in 250 µL aliquots to 0.5 g sub-samples of soil sample A. The  
174 mixtures of soil and laboratory-grown oospores were subsequently subjected to lipid  
175 extraction and FAME production.

176 For all conditions, lipid extraction and conversion to FAMES was carried out as  
177 described in Duan et al. (2013) with slight modifications. Initially, fatty acids were released  
178 and saponified by addition of 3.75 M NaOH dissolved in 50% MeOH<sub>(aq)</sub> (1 mL) to the  
179 sample and incubation at 80 °C for 30 min with occasional mixing. Next, free fatty acids  
180 were methylated by addition of 62.5% 6 N HCl: 37.5% MeOH solution (2 mL) and  
181 incubation at 80 °C for 10 min. Phase separation was then carried out by the addition of 1 mL  
182 of a 1:1 mixture of *n*-hexane and methyl-tert butyl ether with vigorous mixing by vortex for  
183 30 sec. After sufficient phase separation, the top organic phase was transferred to a new glass  
184 tube and washed with 3 mL of 0.3 M NaOH<sub>(aq)</sub>. The top organic phase was again transferred  
185 to a new tube and concentrated under a stream of nitrogen gas. The remaining FAMES were  
186 then resuspended in 150 µL *n*-hexane and transferred to 2 mL GC vials with inserts and  
187 processed immediately or stored at -20 °C until analysis.

188 Samples were analysed on a Shimadzu GCMS-QP2010 Plus. The GC column used  
189 was a Restek RXI-5SilMS (30 m x 0.25 mm x 0.25 µm) and He was the carrier gas. An  
190 aliquot (2 µL) of the sample was injected (8:1 split ratio) at 260 °C with a column flow rate  
191 of 1.09 mL/min and linear velocity of 39.6 cm/sec. The GC conditions were as follows: 2 min  
192 hold at 150 °C followed by a 10 °C increase per min to 280 °C with a final 10 min hold at  
193 280 °C. The MS transfer line temp was 260 °C. MS analysis began after 4 min and ended at  
194 25 min with 3 scans/sec. Ions between 40 and 600 m/z were detected. The EI ion source  
195 operated at 70 eV ionisation energy. Chromatograms were analysed using Shimadzu  
196 GCMSsolution Software. FAMES were annotated using mass spectral matching to the  
197 National Institute for Standards and Technology (NIST) 2011 database. These annotations  
198 were confirmed based on a comparison of the retention time and fragmentation pattern with  
199 those of authentic FAME standards (Larodan). Fatty acids are named using standard  
200 nomenclature (fatty acid chain length: number of double bonds followed by an ω, finally the

201 carbon number from the methyl terminus where the first double bond starts, *e.g.* linoleic acid  
202 ((9Z,12Z)-octadeca-9,12-dienoic acid) is 18:2 $\omega$ 6).

203 FAMES were quantified in two ways. First, the relative amount of each  
204 *P. agathidicida* FAME was determined as a percent of the total fatty acid content. To do this,  
205 the percent of each FAME was determined by integrating the area under the peak  
206 representing each FAME on the chromatogram. The values were then converted to  
207 percentages with all identified peaks per sample combined to total 100%. Thus, each FAME  
208 is calculated as a fraction of 100% of the total FAMES identified per sample. Second, we  
209 quantified molar amounts of 20:4 $\omega$ 6 and 20:5 $\omega$ 3 in soil samples using a 19:0 fatty acid  
210 standard as the internal standard. These two fatty acids were chosen for quantification due to  
211 the difference in ratio of 20:5 $\omega$ 3 to 20:4 $\omega$ 6 when comparing soil samples and cultured  
212 *P. agathidicida*. For use as an internal standard, 100 nmol of 19:0 fatty acid was added  
213 directly to soil samples prior to lipid extraction and conversion to FAMES. For quantification,  
214 response factors for 20:4 $\omega$ 6, 20:5 $\omega$ 3, and 19:0 were first determined and relative response  
215 factors between 20:4 $\omega$ 6/19:0 and 20:5 $\omega$ 3/19:0 were subsequently determined (Dodds *et al.*,  
216 2005). For each condition, five biological replicates were performed, where each replicate  
217 represents a separate extraction, analysed on a separate day. Statistical analyses and graphical  
218 representations of the data were performed and generated using Prism GraphPad (Version  
219 8.2.1).

220

## 221 **Results:**

222 *Comparison of FAME profiles of P. agathidicida and P. cinnamomi*

223 Twelve fatty acids were regularly detected from *P. agathidicida*. The five most  
224 abundant fatty acids were 14:0, 16:0, 18:2 $\omega$ 6, 18:1 $\omega$ 9, and 20:5 $\omega$ 3, constituting greater than  
225 75% of the total fatty acid content (Fig. 1). Comparing *P. agathidicida* mycelia grown at  
226 16 °C and 22 °C revealed slight changes in relative fatty acid amounts. Of the five most  
227 abundant fatty acids, 14:0, 16:0, and 18:2 $\omega$ 6 were slightly reduced (<5 %) at 16 °C compared  
228 to 22 °C while 18:1 $\omega$ 9 and 20:5 $\omega$ 3 were slightly increased (<5 %) at 16 °C compared to  
229 22 °C. We also examined the FAME profile of *P. cinnamomi* mycelia at 16 °C and 22 °C  
230 (Suppl. Fig. 1). The FAME profiles of *P. agathidicida* and *P. cinnamomi* were largely  
231 similar. Eleven fatty acids were detected in *P. cinnamomi*, all of which overlapped with fatty  
232 acids present in *P. agathidicida* (Fig. 1 and Suppl. Fig. 1). Interestingly, the fatty acid 22:1 $\omega$ 9  
233 was regularly present in *P. agathidicida* but not detectable from *P. cinnamomi*. However,

234 previous studies have shown that this fatty acid is present in *P. cinnamomi* at low relative  
235 percentages (Duan *et al.*, 2013). In general, our fatty acid profile for *P. cinnamomi* was  
236 similar to a previously published report that spanned multiple isolates of this species (Duan *et*  
237 *al.*, 2013). Duan *et al.* detected fifteen fatty acids from *P. cinnamomi*. The four additional  
238 fatty acids detected in that study comprised less than 2% of the total fatty acid content.

239

#### 240 *Comparison of FAME profiles of various P. agathidicida lifecycle stages*

241 Environmental conditions can affect the relative abundances of oomycete lifecycle  
242 stages in soil (Erwin & Ribeiro, 1996). We therefore compared the FAME profiles of *P.*  
243 *agathidicida* oospores, zoospores, and mycelia (Fig. 2). Compared to mycelia, the FAME  
244 profiles of oospores and zoospores were less diverse in quality and quantity of acyl chains  
245 that were present. Each FAME that was detected from the mycelial samples was also detected  
246 in oospores, however, the long-chain unsaturated fatty acids were in lower quantities relative  
247 to shorter chain length fatty acids when compared with mycelia. In mycelia, three  
248 polyunsaturated, long-chain fatty acids (20:4 $\omega$ 6, 20:5 $\omega$ 3, 20:3 $\omega$ 6) and two mono-unsaturated,  
249 long-chain fatty acids (20:1 $\omega$ 9, 22:1 $\omega$ 9) were detected and all except 22:1 $\omega$ 9 constituted >1%  
250 of the total FAME profile. In oospores and zoospores, 22:1 $\omega$ 9 was not detected. In zoospores,  
251 18:3 $\omega$ 6 and 20:1 $\omega$ 9 were also not detected. Overall, oospores and zoospores produced lower  
252 quantities of long-chain fatty acids. Different growth media are known to induce changes in  
253 the FAME profiles of *Phytophthora* species (Larkin & Groves, 2003, Duan *et al.*, 2011), and  
254 may have contributed to the variation we observed among life-cycles stages. However, these  
255 effects are difficult to quantify since no single laboratory procedure exists to produce oospore  
256 and zoospores in *P. agathidicida*.

257

#### 258 *Detection of P. agathidicida oospores in soil samples*

259 To determine if the identified acyl chains could serve as biomarkers for identifying  
260 *P. agathidicida* in soil, we first examined the fatty acid profile of five field collected soil  
261 samples. In each soil sample, we characterised the 12 fatty acids produced by  
262 *P. agathidicida*. Of the 12 *P. agathidicida* fatty acids, eight were readily detectable in  
263 varying quantities across samples (Suppl. Fig. 2). The addition of oospores to the soil  
264 revealed that no unique *P. agathidicida* fatty acids were detectable (Suppl. Fig. 3). However,  
265 the relative percent of the long-chain polyunsaturated fatty acid 20:5 $\omega$ 3, which was present in  
266 low quantities in soil (sup Figure 2) and is relatively abundant in *P. agathidicida* (Fig. 1),



267 increased linearly with increasing oospores added to soil (Suppl. Fig. 3). In contrast, the  
268 percent of 20:4 $\omega$ 6 remained relatively stable with increasing numbers of oospore added  
269 (Suppl. Fig. 3). With this observation, we determined the molar quantity of 20:5 $\omega$ 3 and  
270 20:4 $\omega$ 6 and examined the ratios of these fatty acids in each sample. The ratio of 20:5 $\omega$ 3 to  
271 20:4 $\omega$ 6 in soil samples alone is <1 (Table 1). In *P. agathidicida* oospores, this ratio is >4  
272 (Table 1). Thus, the presence of *P. agathidicida* in soil should lead to an increase in the ratio  
273 of 20:5 $\omega$ 3 to 20:4 $\omega$ 6 relative to *P. agathidicida*-free soil. As oospores were added to soil, the  
274 molar quantity of 20:5 $\omega$ 3 and 20:4 $\omega$ 6 both increased (Fig. 3, Suppl. Fig. 3). However, this  
275 change was greater for 20:5 $\omega$ 3 than for 20:4 $\omega$ 6 leading to a greater ratio of 20:5 $\omega$ 3 to 20:4 $\omega$ 6  
276 as oospores increased (Table 1). In *P. agathidicida*-free soil, the 20:5 $\omega$ 3 to 20:4 $\omega$ 6 ratio was  
277 0.92. This ratio shifted to 1.06 at the lowest concentration of added oospores (25,000), and  
278 increased to 1.4 at the highest concentration of added oospores (200,000).

279

## 280 **Discussion:**

281 Rapid and reliable diagnostics are essential when trying to manage diseases in both  
282 humans and plants. In the case of kauri dieback, tracking the spread of the *P. agathidicida* is  
283 particularly difficult due to the latent onset of disease symptoms (Bradshaw *et al.*, 2020). In  
284 this study, we present the first FAME profile of *P. agathidicida*. We also assessed the  
285 potential of FAME analysis as a tool for detecting *P. agathidicida* in soil. A significant  
286 advantage of a FAME approach relative to soil baiting and PCR-based methods, is the  
287 potential to quantify the pathogen in the sample. Overall, the FAME profile of *P.*  
288 *agathidicida* is largely consistent with the FAME profiles of other *Phytophthora* species. The  
289 five most abundant *P. agathidicida* fatty acids (14:0, 16:0, 18:2 $\omega$ 6, 18:1 $\omega$ 9, and 20:5 $\omega$ 3) are  
290 also the five most abundant fatty acids in six other species of *Phytophthora* (Larkin &  
291 Groves, 2003, Duan *et al.*, 2013). The similarity of *P. agathidicida* and other studied  
292 *Phytophthora* species is particularly interesting as *P. agathidicida* falls into the recently  
293 categorized (but as of yet understudied) *Phytophthora* clade five (Weir *et al.*, 2015); our data  
294 suggest that lipid profiles may be conserved across different clades of *Phytophthora*.

295 While we identified no unique FAME biomarker for *P. agathidicida*, we show that  
296 the relative quantities 20:4 $\omega$ 6 and 20:5 $\omega$ 3 in soil samples can be used as an index of the  
297 likelihood that *Phytophthora* species are present. Our data reveal that the addition of  
298 increasing amounts of *P. agathidicida* oospores to soil leads to an increase in the ratio of  
299 20:5 $\omega$ 3 to 20:4 $\omega$ 6. Thus, the ratio of 20:5 $\omega$ 3 to 20:4 $\omega$ 6 can function as a biomarker

300 indicating the presence or absence of *Phytophthora* species in forest soils. This builds on  
301 FAME analysis performed on *P. sojae* where long-chain polyunsaturated fatty acids were  
302 detected above background soil levels when zoospores were added to soil (Yousef et al.,  
303 2012). Overall these findings suggest that ratios of long-chain polyunsaturated fatty acids can  
304 function as biomarkers for detecting *Phytophthora* on a genus level. Detecting *Phytophthora*  
305 as a genus is useful and can potentially be used in conjunction with soil baiting assays or other  
306 molecular diagnostics for species confirmation. For example, large scale soil sampling and  
307 screening of samples via FAME analysis could be used to identify samples with 20:5 $\omega$ 3:  
308 20:4 $\omega$ 6 > 1. These samples could subsequently be subjected to the soil-baiting assay to  
309 confirm the presence of *P. agathidicida*. This is similar to the “funnel and filter” model used  
310 for screening soils contaminated with *P. ramorum* (Smart et al., 2021). In that example, soils  
311 were pre-screened for the presence of *Phytophthora* using an immunosorbent assay. Soils  
312 positive for *Phytophthora* were then examined using qPCR to determine if *P. ramorum* was  
313 present.

314 The work presented here highlights the potential of the ratio of 20:5 $\omega$ 3 to 20:4 $\omega$ 6 to  
315 function as a tool for the detection of *Phytophthora* in soils. Nevertheless, further studies and  
316 analyses could help to optimize this promising diagnostic tool. Our results suggest that basic  
317 qualitative FAME analysis is not sufficient for differentiating *P. agathidicida* from other  
318 *Phytophthora* species. However, previous studies indicate that FAME analysis can be used to  
319 distinguish not only *Phytophthora* species but isolates within a species as well (Larkin &  
320 Groves, 2003, Duan *et al.*, 2013). For example, cluster analysis based on FAME profiles was  
321 used to differentiate cultured *P. cactorum*, *P. citrophthora*, *P. cinnamomi*, *P. cryptogea*, and  
322 *P. nicotianae* (Duan et al., 2013). In another study, using similar techniques, individual  
323 isolates of cultured *P. infestans* were differentiated (Larkin & Groves, 2003). This suggests  
324 that a more detailed characterisation of *P. agathidicida* FAMES may provide sufficient  
325 information for distinguishing *P. agathidicida* from other *Phytophthora* species.  
326 Additionally, utilising extraction techniques that target specific groups of lipids such as  
327 phospholipids or neutral lipids may help to further enrich target fatty acids such as 20:5 $\omega$ 3  
328 and reduce background signals from complex environmental samples like soil (Drenovsky *et*  
329 *al.*, 2004).

330 In contrast to FAME analysis, several DNA based diagnostic tools have been  
331 explored for use in detecting *P. agathidicida* and other *Phytophthora* species. These include  
332 both conventional qPCR and loop-mediated isothermal amplification (LAMP) methods (Than

333 *et al.*, 2013, McDougal *et al.*, 2014, Hansen *et al.*, 2016, Winkworth *et al.*, 2020). Recently,  
334 Winkworth *et al.* combined aspects of the existing *P. agathidicida* soil-baiting assay with  
335 LAMP to reduce the overall sample processing time (Winkworth *et al.*, 2020). LAMP is a  
336 DNA amplification-based method that uses primers to amplify regions of the genome-  
337 specific to an organism of interest (Wong *et al.*, 2018). Efficient amplification can lead to a  
338 detectable signal, such as color-change, that can often be assessed quickly and on-site  
339 spectrophotometrically. LAMP assays efficiently detected *P. agathidicida* immediately  
340 following baiting (Winkworth *et al.*, 2020). This variation on standard soil-baiting effectively  
341 eliminated the final week of the assay, shortening the process to two weeks. It is unclear  
342 whether or not LAMP would be useful at directly testing soil samples for the presence of  
343 *P. agathidicida*.

344         Currently, our knowledge of the geographical spread of *P. agathidicida* is limited  
345 primarily to the presence of visible disease symptoms combined with soil-baiting assays  
346 (Bradshaw *et al.*, 2020). More thorough knowledge of the full range of *P. agathidicida* could  
347 potentially help answer questions regarding disease resistance in kauri trees and  
348 environmental factors that lead to infection. The knowledge gap is mainly due to the lack of a  
349 quick, cost-effective, and simple diagnostic tool. While effective, soil-baiting is not amenable  
350 to high-throughput, widespread testing. Both FAME analysis and DNA based molecular  
351 diagnostics are promising but have limitations. Further development of these techniques in  
352 conjunction with soil-baiting would help to expand our knowledge of the distribution of  
353 *P. agathidicida* in New Zealand enabling better management of kauri dieback disease.

354

355 **Funding:** This work was supported *via* strategic research funds (to MLG) from the School of  
356 Biological Sciences at Victoria University of Wellington and Seed and Scope funding (to  
357 JRD) from Ngā Rākau Taketake, part of the Bioheritage National Science Challenge.

358

359 **Acknowledgements:** We'd like to thank Natascha Lewe for her assistance with fatty acid  
360 extractions and Mike Fairhurst for his assistance in isolating oospores.

361

362 **References:**

363

364 Beever RE, Bellgard SE, Dick MA, Horner IJ & Ramsfield T (2010) Detection of  
365 *Phytophthora* taxon Agathis (PTA). Landcare Report LC0910/137. Ministry for Agriculture  
366 & Forestry, Biosecurity New Zealand, Wellington, New Zealand.

- 367 Bellgard SE, Padamsee M, Probst CM, Lebel T & Williams SE (2016) Visualizing the early  
368 infection of *Agathis australis* by *Phytophthora agathidicida*, using microscopy and  
369 fluorescent in situ hybridization. *Forest Pathol* **46**: 622-631.
- 370 Bradshaw RE, Bellgard SE, Black A, *et al.* (2020) *Phytophthora agathidicida*: research  
371 progress, cultural perspectives and knowledge gaps in the control and management of kauri  
372 dieback in New Zealand. *Plant Pathol* **69**: 3-16.
- 373 Cavigelli MA, Robertson GP & Klug MJ (1995) Fatty acid methyl ester (FAME) profiles as  
374 measures of soil microbial community structure. *Plant Soil* **170**: 99-113.
- 375 Dodds ED, McCoy MR, Rea LD & Kennish JM (2005) Gas Chromatographic Quantification  
376 of Fatty Acid Methyl Esters: Flame Ionization Detection vs. Electron Impact Mass  
377 Spectrometry. *Lipids* **40**.
- 378 Drenovsky RE, Elliot GN, Graham KJ & Scow KM (2004) Comparison of phospholipid fatty  
379 acid (PLFA) and total soil fatty acid methyl esters (TSFAME) for characterizing soil  
380 microbial communities. *Soil Biol Biochem* **36**: 1793-1800.
- 381 Duan CH, Riley MB & Jeffers SN (2011) Effects of growth medium, incubation temperature,  
382 and mycelium age on production of five major fatty acids by six species of *Phytophthora*.  
383 *Arch Phytopathol Plant Prot* **44**.
- 384 Duan CH, Riley MB & Jeffers SN (2013) Evaluation of fatty acid methyl ester profile and  
385 amplified fragment length polymorphism analyses to distinguish five species of  
386 *Phytophthora* associated with ornamental plants. *Arch Phytopathol Plant Prot* **46**: 295-311.
- 387 Ehrhardt CJ, Chu V, Brown T, Simmons TL, Swan BK, Bannan J & Robertson JM (2010)  
388 Use of fatty acid methyl ester profiles for discrimination of *Bacillus cereus* T-strain spores  
389 grown on different media. *Appl Environ Microbiol* **76**: 1902-1912.
- 390 Erwin DC & Ribeiro OK (1996) *Phytophthora diseases worldwide*. APS Press, St. Paul,  
391 Minn.
- 392 Fairhurst MJ, Deslippe JR & Gerth ML (2021) A fluorescence-based viability assay for  
393 *Phytophthora agathidicida* oospores. *PhytoFrontiers* **In review**.

- 394 Griffiths RG, Dancer J, O'Neill E & Harwood JL (2003) Effect of culture conditions on the  
395 lipid composition of *Phytophthora infestans*. *New Phytol* **158**: 337-344.
- 396 Hansen ZR, Knaus BJ, Tabima JF, Press CM, Judelson HS, Grunwald NJ & Smart CD  
397 (2016) Loop-mediated isothermal amplification for detection of the tomato and potato late  
398 blight pathogen, *Phytophthora infestans*. *J Appl Microbiol* **120**: 1010-1020.
- 399 Lacey RF, Fairhurst MJ, Daley KJ, Ngata-Aerengamate T, Patterson HR, Patrick WM &  
400 Gerth ML (2021) Assessing the effectiveness of oxathiapiprolin towards *Phytophthora*  
401 *agathidicida*, the causal agent of kauri dieback disease. *bioRxiv* doi:  
402 10.1101/2021.03.10.434845.
- 403 Larkin RP & Groves CL (2003) Identification and characterization of isolates of  
404 *Phytophthora infestans* using fatty acid methyl ester (FAME) profiles. *Plant Dis* **87**: 1233-  
405 1243.
- 406 McDougal RL, Bellgard SE, Scott PM & Ganley R (2014) Comparison of a real-time PCR  
407 assay and a soil bioassay technique for detection of *Phytophthora* taxon Agathis from soil.  
408 MPI contract report 53789. New Zealand Forestry Research Institute Ltd., Wellington, New  
409 Zealand.
- 410 O'Brien PA, Williams N & Hardy GES (2009) Detecting *Phytophthora*. *Crit Rev Microbiol*  
411 **35**: 169-181.
- 412 Olsson PA (1999) Signature fatty acids provide tools for determination of the distribution and  
413 interactions of mycorrhizal fungi in soil. *Fems Microbiol Ecol* **29**: 303-310.
- 414 Rastogi G & Rajesh KS (2011) Molecular techniques to assess microbial community  
415 structure, function, and dynamics in the environment. *Microbes and Microbial*  
416 *Technology*, (Ahmad I, Ahmad F & Pichtel J, eds.), 29-57. Springer, New York, NY.
- 417 Scott PM & Williams NM (2014) *Phytophthora* diseases in New Zealand forests. *New Zeal J*  
418 *For* **59**: 14-21.
- 419 Smart A, Byrne J, Hammerschmidt R, Snover-Clift KL, Stack JP, Brenes-Arguedas T, Jones  
420 JB & Harmon CL (2021) Evolving Plant Diagnostics During a Pandemic. *Plant Health*  
421 *Progress* **22**.

- 422 Than DJ, Hughes KJD, Boonham N, Tomlinson JA, Woodhall JW & Bellgard SE (2013) A  
423 TaqMan real-time PCR assay for the detection of *Phytophthora* ‘taxon Agathis’ in soil,  
424 pathogen of Kauri in New Zealand. *Forest Pathol.*
- 425 Waipara NW, Hill S, Hill LMW, Hough EG & Horner IJ (2013) Surveillance methods to  
426 determine tree health, distribution of kauri dieback disease and associated pathogens. *N Z*  
427 *Plant Protect* **66**.
- 428 Weir BS, Paderes EP, Anand N, Uchida JY, Pennycook SR, Bellgard SE & Beever RE  
429 (2015) A taxonomic revision of *Phytophthora* Clade 5 including two new species,  
430 *Phytophthora agathidicida* and *Phytophthora cocois*. *Phytotaxa* **205**: 21-38.
- 431 Welch DF (1991) Applications of cellular fatty acid analysis. *Clin Microbiol Rev* **4**: 422-38.
- 432 White DC, Lytle CA, Gan YD, Piceno YM, Wimpee MH, Peacock AD & Smith CA (2002)  
433 Flash detection/identification of pathogens, bacterial spores and bioterrorism agent  
434 biomarkers from clinical and environmental matrices. *J Microbiol Methods* **48**: 139-47.
- 435 Winkworth RC, Nelson BCW, Bellgard SE, Probst CM, McLenachan PA & Lockhart PJ  
436 (2020) A LAMP at the end of the tunnel: A rapid, field deployable assay for the kauri  
437 dieback pathogen, *Phytophthora agathidicida*. *PLoS One* **15**: e0224007.
- 438 Wong YP, Othman S, Lau YL, Radu S & Chee HY (2018) Loop-mediated isothermal  
439 amplification (LAMP): a versatile technique for detection of micro-organisms. *J Appl*  
440 *Microbiol* **124**: 626-643.
- 441 Yousef LF, Wojno M, Dick WA & Dick RP (2012) Lipid profiling of the soybean pathogen  
442 *Phytophthora sojae* using Fatty Acid Methyl Esters (FAMEs). *Fungal Biol* **116**: 613-9.  
443  
444  
445  
446  
447  
448  
449  
450

451 **Table 1: Ratios of 20:5 $\omega$ 3 to 20:4 $\omega$ 6 fatty acids in soil, soil with *P. agathidicida* oospores**  
452 **added, and *P. agathidicida* oospores alone.**

|                                 | Soil<br>alone | 25k<br>oospores<br>in soil | 50k<br>oospores<br>in soil | 100k<br>oospores<br>in soil | 200k<br>oospores<br>in soil | 100k<br>oospores<br>alone |
|---------------------------------|---------------|----------------------------|----------------------------|-----------------------------|-----------------------------|---------------------------|
| 20:5 $\omega$ 3/20:4 $\omega$ 6 | 0.92          | 1.06                       | 1.12                       | 1.41                        | 1.4                         | 4.05                      |

453 The ratios were determined by dividing the average concentration of 20:5 $\omega$ 3 by 20:4 $\omega$ 6 for  
454 each condition across five biological replicates.

455

456

457

458

459

460

461

462

463

464

465

466

467

468

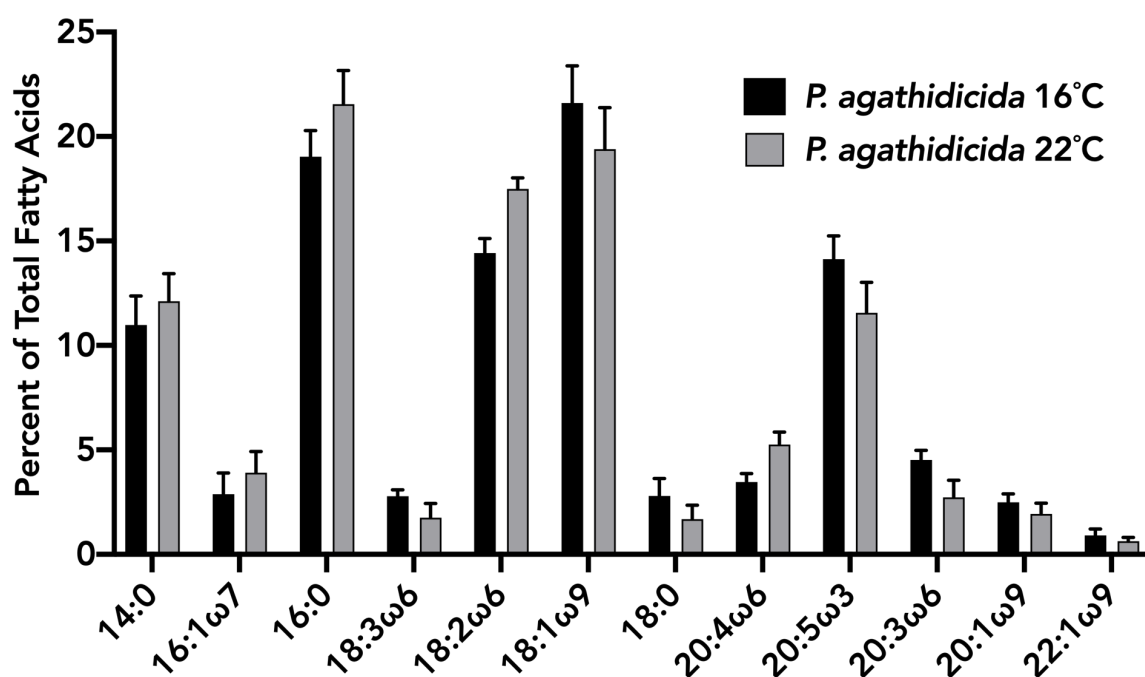

469

470 **Figure 1: Fatty acid profile of *P. agathidicida* at varying temperatures.** FAMES were  
471 produced and analysed from mycelia of *P. agathidicida* grown at 16 °C and 22 °C. The  
472 percent of each fatty acid is the average relative percent of five biological replicates. Error  
473 bars indicate standard deviation.

474

475

476



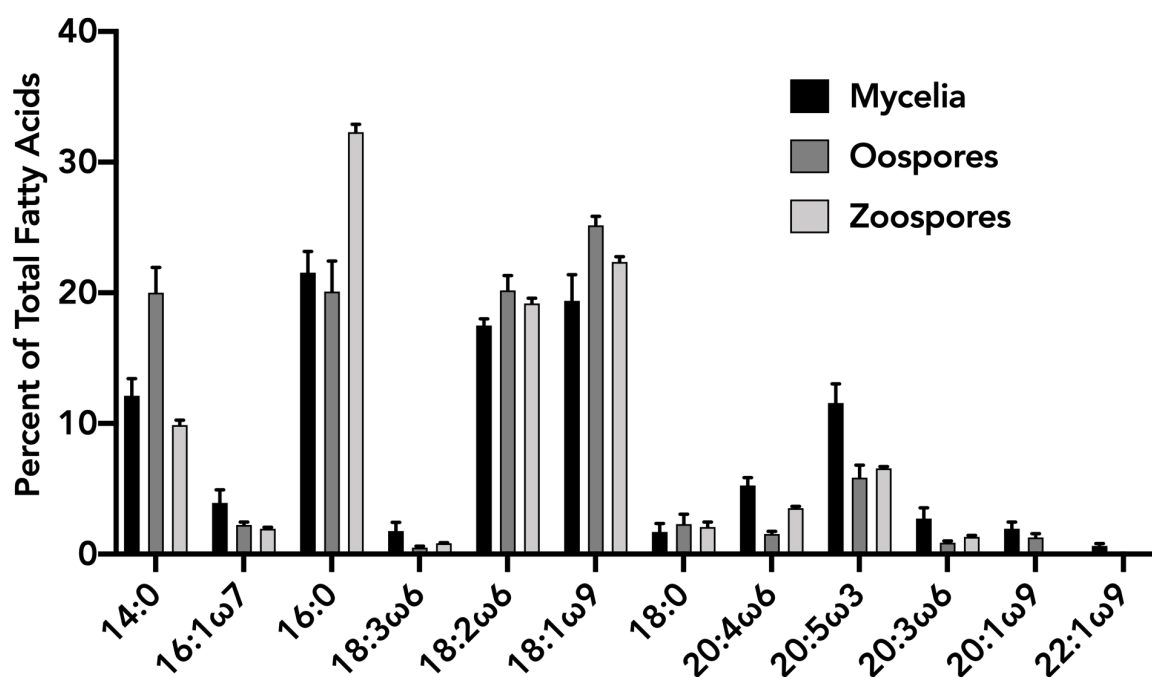

477

478 **Figure 2: Fatty acid profile comparison of different *P. agathidicida* lifecycle stages.**

479 FAMES were produced and analysed from *P. agathidicida* mycelia, oospores, and zoospores.

480 The percent of each fatty acid is an average relative percent of five biological replicates.

481 Error bars indicate standard deviation.

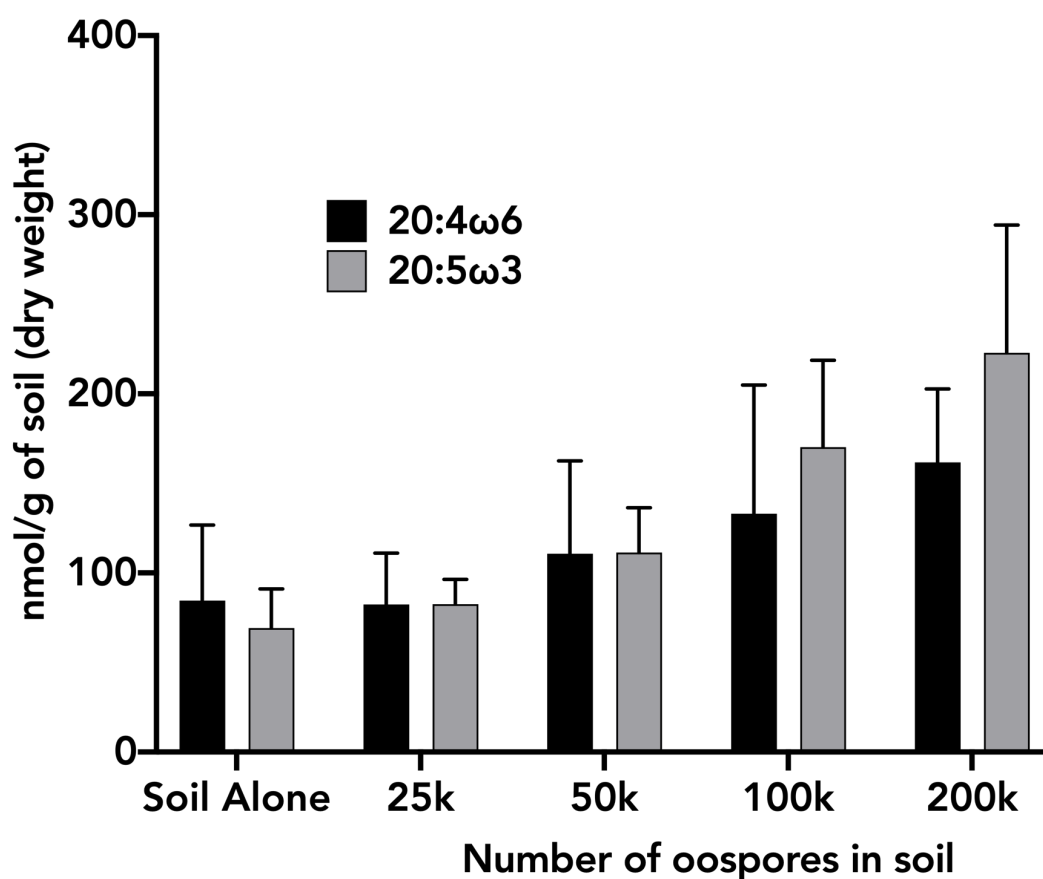

482

483 **Figure 3: Quantification of 20:4ω6 and 20:5ω3 fatty acids in soil samples with**  
484 ***P. agathidicida* oospores added.** Oospores were added at varying concentrations to 0.5 g of  
485 soil containing a 19:0 fatty acid internal standard. FAMES were then produced and analysed  
486 from each sample, and the concentration of 20:4ω6 and 20:5ω3 was determined as  
487 nmol/0.5 g of soil. The values are an average of five biological replicates. Error bars indicate  
488 standard deviation.

489

490
